# Supplementary material
Source: PubMed Central journal article supplement (PMC7606727)
Supplement: NIHMS1619096-supplement-1.pdf [file NIHMS1619096-supplement-1.pdf]

Supplemental table 1. Cognitive domains assessed in the neuropsychological test battery

| Cognitive domain                | Neuropsychological tests                                                                                                                   |
|---------------------------------|--------------------------------------------------------------------------------------------------------------------------------------------|
| Learning                        | Hopkins Verbal Learning Test - Revised (HVLt-R) - Total Recall<br>Brief Visuospatial Memory Test - Revised (BVMT-R) - Total Recall         |
| Memory                          | HVLt-R - Delayed Recall<br>BVMT-R - Delayed Recall                                                                                         |
| Motor                           | Grooved Pegboard Test, dominant and non-dominant hands                                                                                     |
| Speed of Information Processing | Trail Making Test (TMT), Part A<br>Wechsler Adult Intelligence Scale - Third Edition (WAIS-III) - Digit Symbol<br>WAIS-III - Symbol Search |
| Attention/Working Memory        | WAIS-III - Letter Number Sequencing<br>Paced Auditory Serial Addition Test (PASAT) - 50 item version                                       |
| Executive functioning           | TMT, Part B<br>Wisconsin Card Sorting Test, 64 card version (WCST-64) - perseverative responses                                            |
| Verbal Fluency                  | Controlled Oral Word Association Test (COWAT-FAS)                                                                                          |
